# Supplementary material for: S⋯O chalcogen bonding in sulfa drugs: insights from multipole charge density and X-ray wavefunction of acetazolamide
Source: Royal Society of Chemistry journal article supplement (doi:10.1039/c5cp04412j), 2015-01-01
Supplement: c5cp04412j1.pdf [file c5cp04412j1.pdf]

## ELECTRONIC SUPPLEMENTARY INFORMATION

### S...O Chalcogen Bonding in Sulfa Drugs: Insights from Multipole Charge Density and X-ray Wavefunction of Acetazolamide

Sajesh P. Thomas, Dylan Jayatilaka and T. N. Guru Row

#### 1. Intermolecular interaction energy estimation from *CrystalExplorer*

The interaction energy estimates from *CrystalExplorer* uses the unperturbed gas phase molecular wavefunction calculated at B3LYP/6-31G(d,p) level (Figure S1 and Table S1). The method applies space group symmetry operations on the density matrix corresponding to this molecular wave function to generate symmetry related neighbors and calculate the interaction energy. Further, the electrostatic terms are appended by terms to obtain the total interaction energy. Scale factors were obtained for the electrostatic, repulsion, dispersion, and polarization terms separately from a fitting the interaction energy values to large number of accurate interaction energy values reported in the literature ( for more details of the calculation, see: M. J. Turner, S. Grabowsky, D. Jayatilaka and M. A. Spackman, *J. Phys. Chem. Lett.*, 2014, **5**, 4249). These interaction energy values were used to generate the energy frameworks (Figure S2), which represent the topology of intermolecular interactions in terms of their relative strengths (for details of energy frameworks, see: M. J. Turner, S. P. Thomas, M. W. Shi, D. Jayatilaka and M. A. Spackman, *Chem Commun*, 2015, **51**, 3735).

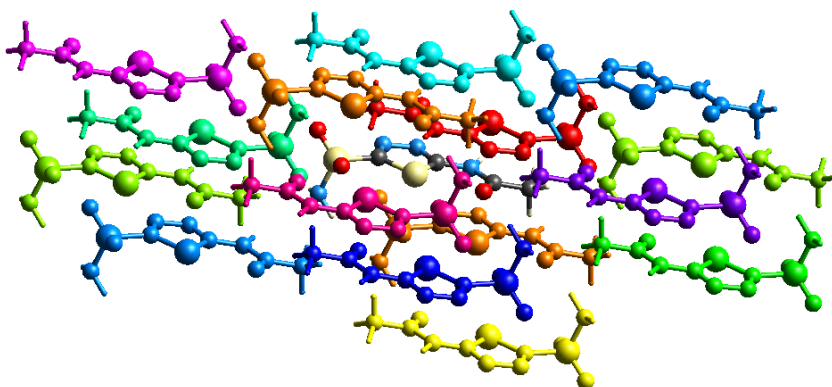

**Figure S1.** Colour coding based on the interaction energies of various neighbors around a central molecule.

**Table S1.** The interaction energies (kJ/mol) of various neighbors around a central molecule, and the scale factors used.

|  | Symop      | Dist. | Wavefunc.        | Coul.  | Polariz. | Disp. | Repul. | Total |
|--|------------|-------|------------------|--------|----------|-------|--------|-------|
|  | -x, -y, -z | 6.85  | B3LYP/6-31G(d,p) | -125.0 | -29.7    | -26.3 | 140.3  | -94.1 |
|  | x, y, z    | 5.28  | B3LYP/6-31G(d,p) | -6.9   | -5.1     | -29.2 | 22.4   | -22.5 |
|  | -x, -y, -z | 8.06  | B3LYP/6-31G(d,p) | 6.5    | -0.8     | -2.7  | 0.0    | 4.1   |
|  | x, y, z    | 11.46 | B3LYP/6-31G(d,p) | -4.5   | -1.2     | -5.3  | 2.3    | -8.8  |
|  | -x, -y, -z | 13.16 | B3LYP/6-31G(d,p) | 2.6    | -0.9     | -6.4  | 6.0    | 0.3   |
|  | -x, -y, -z | 7.85  | B3LYP/6-31G(d,p) | -61.3  | -13.0    | -16.9 | 48.7   | -60.3 |
|  | -x, -y, -z | 4.60  | B3LYP/6-31G(d,p) | -40.5  | -8.6     | -38.5 | 27.0   | -66.0 |
|  | x, y, z    | 9.35  | B3LYP/6-31G(d,p) | 13.1   | -2.9     | -9.7  | 4.8    | 6.3   |
|  | -x, -y, -z | 4.81  | B3LYP/6-31G(d,p) | -94.0  | -19.7    | -34.9 | 91.3   | -90.0 |
|  | -x, -y, -z | 10.74 | B3LYP/6-31G(d,p) | -13.9  | -1.9     | -6.9  | 5.4    | -18.8 |
|  | -x, -y, -z | 10.37 | B3LYP/6-31G(d,p) | 10.1   | -1.4     | -2.6  | 0.7    | 7.9   |
|  | -x, -y, -z | 6.09  | B3LYP/6-31G(d,p) | 6.4    | -2.0     | -7.7  | 3.1    | 0.7   |

Scale Factor Key:  
Ke = electrostatic energy  
Kp = polarization energy  
Kd = dispersion energy  
Kr = repulsion energy

| Energy Model     | Ke    | Kp    | Kd    | Kr    |
|------------------|-------|-------|-------|-------|
| HF/3-21G         | 0.882 | 0.593 | 0.852 | 0.681 |
| MP2/6-31G(d,p)   | 1.027 | 0.722 | 0.842 | 0.605 |
| B3LYP/6-31G(d,p) | 1.063 | 0.756 | 0.843 | 0.595 |

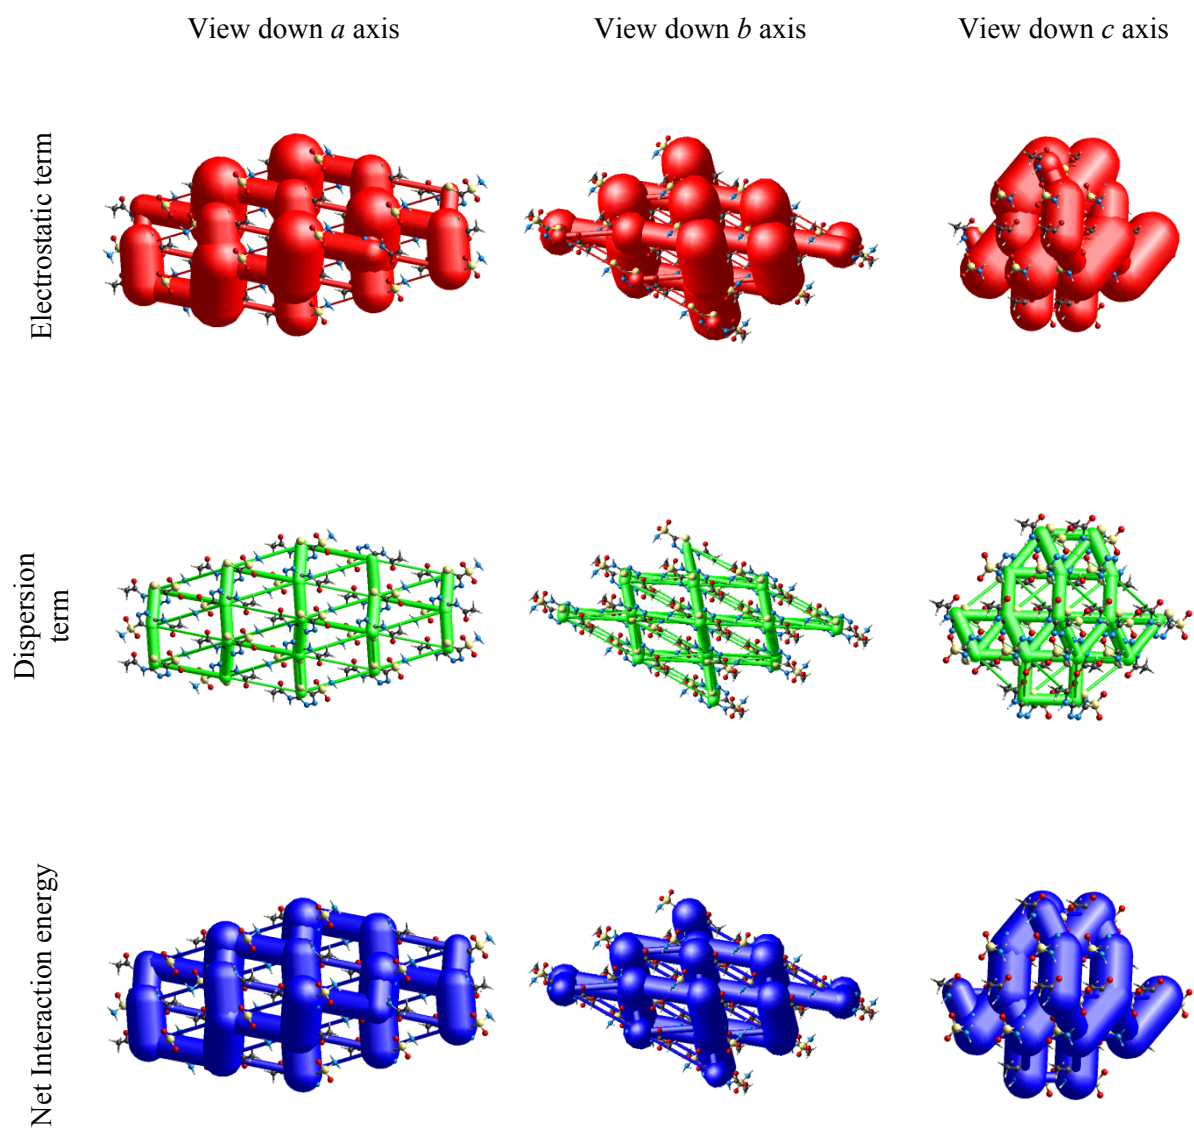

**Figure S2.** Energy framework based on electrostatic (red) and dispersion (green) components and net interaction energies (blue) viewed down different directions.

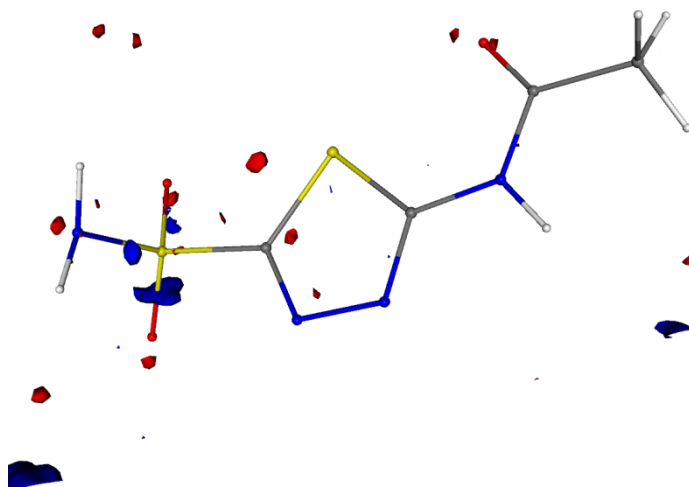

**Figure S3.** 3D residual density maps generated from XWR, isosurfaces plotted at  $\pm 0.1 \text{ e}\text{\AA}^{-3}$  (blue for peaks and red for holes).

**Table S2.** Topological parameters for intramolecular covalent bonds obtained from experimental multipole model (MM), X-ray wavefunction refinement (XWR), and gas phase calculations at BLYP/def2TZVP level.

|    |            | Electron density at BCP, $\rho(\text{e}\text{\AA}^{-3})$ |       |           | Laplacian $\nabla^2\rho (\text{e}\text{\AA}^{-5})$ |         |           |
|----|------------|----------------------------------------------------------|-------|-----------|----------------------------------------------------|---------|-----------|
|    |            | MM                                                       | XWR   | Gas phase | MM                                                 | XWR     | Gas phase |
| 1  | S(1)–C(1)  | 1.376                                                    | 1.464 | 1.423     | -4.916                                             | -2.924  | -2.456    |
| 2  | S(1)–C(2)  | 1.444                                                    | 1.434 | 1.444     | -6.374                                             | -2.630  | -2.631    |
| 3  | S(2)–O(2)  | 2.304                                                    | 2.14  | 2.121     | -2.084                                             | 5.270   | 5.463     |
| 4  | S(2)–O(3)  | 2.392                                                    | 2.13  | 2.117     | -1.973                                             | 5.470   | 5.297     |
| 5  | S(2)–N(1)  | 1.866                                                    | 1.77  | 1.729     | -16.781                                            | -2.702  | -2.023    |
| 6  | S(2)–C(1)  | 1.412                                                    | 1.458 | 1.448     | -7.927                                             | -3.016  | -2.870    |
| 7  | O(1)–C(3)  | 2.846                                                    | 2.74  | 2.756     | -26.754                                            | -3.000  | -3.448    |
| 8  | N(1)–H(1N) | 2.123                                                    | 2.286 | 2.293     | -29.780                                            | -11.22  | -10.266   |
| 9  | N(1)–H(2N) | 2.311                                                    | 2.33  | 2.341     | -31.858                                            | -11.70  | -10.995   |
| 10 | N(2)–N(3)  | 2.359                                                    | 2.444 | 2.423     | -4.469                                             | -4.716  | -4.417    |
| 11 | N(2)–C(1)  | 2.616                                                    | 2.562 | 2.562     | -27.898                                            | -8.526  | -7.382    |
| 12 | N(3)–C(2)  | 2.544                                                    | 2.508 | 2.509     | -26.760                                            | -8.524  | -7.325    |
| 13 | N(4)–C(2)  | 2.250                                                    | 2.21  | 2.176     | -19.620                                            | -6.484  | -6.205    |
| 14 | N(4)–C(3)  | 2.223                                                    | 2.196 | 2.174     | -25.824                                            | -6.722  | -6.110    |
| 15 | N(4)–H(4N) | 2.109                                                    | 2.168 | 2.178     | -27.310                                            | -10.788 | -9.410    |
| 16 | C(3)–C(4)  | 1.822                                                    | 1.788 | 1.780     | -14.308                                            | -4.228  | -4.124    |
| 17 | C(4)–H(4A) | 1.771                                                    | 1.914 | 1.921     | -14.592                                            | -5.924  | -5.958    |
| 18 | C(4)–H(4B) | 1.793                                                    | 1.878 | 1.887     | -16.382                                            | -5.724  | -5.713    |

|    |            |       |       |       |         |        |        |
|----|------------|-------|-------|-------|---------|--------|--------|
| 19 | C(4)-H(4C) | 1.776 | 1.856 | 1.844 | -15.860 | -5.620 | -5.477 |
|----|------------|-------|-------|-------|---------|--------|--------|

**Table S3.** Roby bond indices and populations obtained from XWR, for various bonds in AZM.

| Atom_a | Atom_b | n_a       | n_b      | n_ab      | s_ab     | Bond Index | % Covalency |
|--------|--------|-----------|----------|-----------|----------|------------|-------------|
| S1     | O1     | 16.946195 | 9.367678 | 26.274396 | 0.039476 | 0.205785   | 100.000000  |
| C4     | C3     | 9.056835  | 8.250822 | 15.855564 | 1.452093 | 1.184160   | 92.385258   |
| N2     | C1     | 8.775620  | 8.506082 | 15.397128 | 1.884574 | 1.738339   | 99.433827   |
| N3     | C2     | 8.854447  | 8.435623 | 15.525990 | 1.764081 | 1.609201   | 98.645582   |
| N3     | N2     | 8.854447  | 8.775620 | 16.205594 | 1.424473 | 1.361051   | 99.910951   |
| N4     | C2     | 9.201806  | 8.435623 | 16.109547 | 1.527883 | 1.354834   | 91.916695   |
| N4     | C3     | 9.201806  | 8.250822 | 15.948798 | 1.503831 | 1.409426   | 89.880724   |
| O1     | C3     | 9.367678  | 8.250822 | 15.834204 | 1.784295 | 1.812352   | 90.573513   |
| S1     | C1     | 16.946195 | 8.506082 | 24.141269 | 1.311008 | 1.226545   | 98.770384   |
| S1     | C2     | 16.946195 | 8.435623 | 24.028350 | 1.353468 | 1.273806   | 98.499784   |
| S2     | N1     | 16.524878 | 9.271885 | 24.776219 | 1.020545 | 1.015312   | 89.052946   |
| S2     | O2     | 16.524878 | 9.384754 | 24.702533 | 1.207098 | 1.310722   | 90.831467   |
| S2     | O3     | 16.524878 | 9.399119 | 24.719858 | 1.204139 | 1.308932   | 90.331693   |
| H1N    | N1     | 1.428112  | 9.271885 | 9.406806  | 1.293192 | 0.951850   | 87.530083   |
| H2N    | N1     | 1.424591  | 9.271885 | 9.410688  | 1.285789 | 0.951491   | 87.675217   |
| H4A    | C3     | 1.595832  | 8.250822 | 9.804439  | 0.042215 | 0.104576   | 50.187547   |
| H4A    | C4     | 1.595832  | 9.056835 | 9.238139  | 1.414528 | 0.947780   | 95.629512   |
| H4B    | C4     | 1.614619  | 9.056835 | 9.241046  | 1.430408 | 0.946300   | 96.113780   |
| H4C    | C4     | 1.594069  | 9.056835 | 9.224355  | 1.426549 | 0.948823   | 95.401846   |
| H4N    | C2     | 1.394739  | 8.435623 | 9.780486  | 0.049876 | 0.154613   | 24.226672   |
| H4N    | C3     | 1.394739  | 8.250822 | 9.599515  | 0.046046 | 0.161260   | 20.957587   |
| H4N    | N4     | 1.394739  | 9.201806 | 9.370506  | 1.226039 | 0.934561   | 85.731724   |
